# Supplementary material for: Chemical control of the viscoelastic properties of vinylogous urethane vitrimers
Source: PubMed Central journal article supplement (PMC5364391; doi:10.1038/ncomms14857), 2017-03-20
Supplement: ncomms14857-s1.pdf [file ncomms14857-s1.pdf]

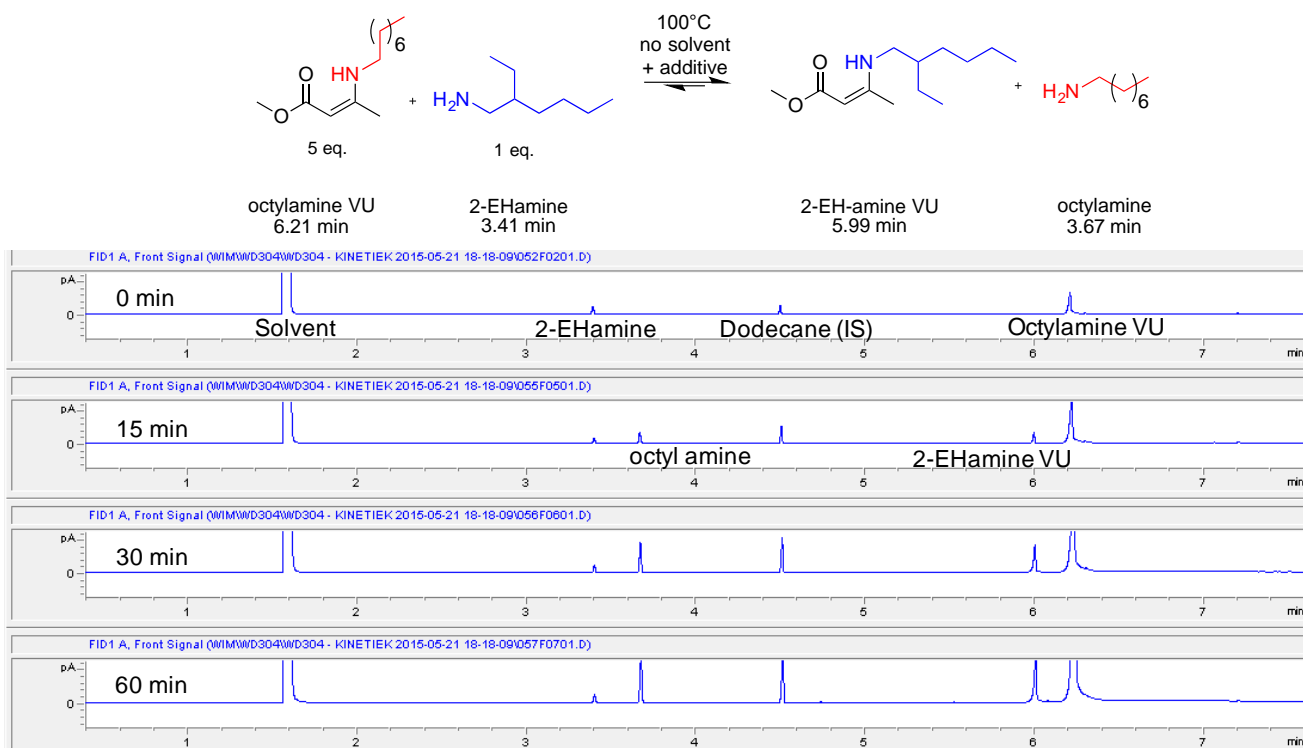

**Supplementary Figure 1:** GC-traces of the uncatalysed exchange reaction at 100°C, showing the appearance of octylamine (3.56 min) and 2-EHamine VU (5.99 min).

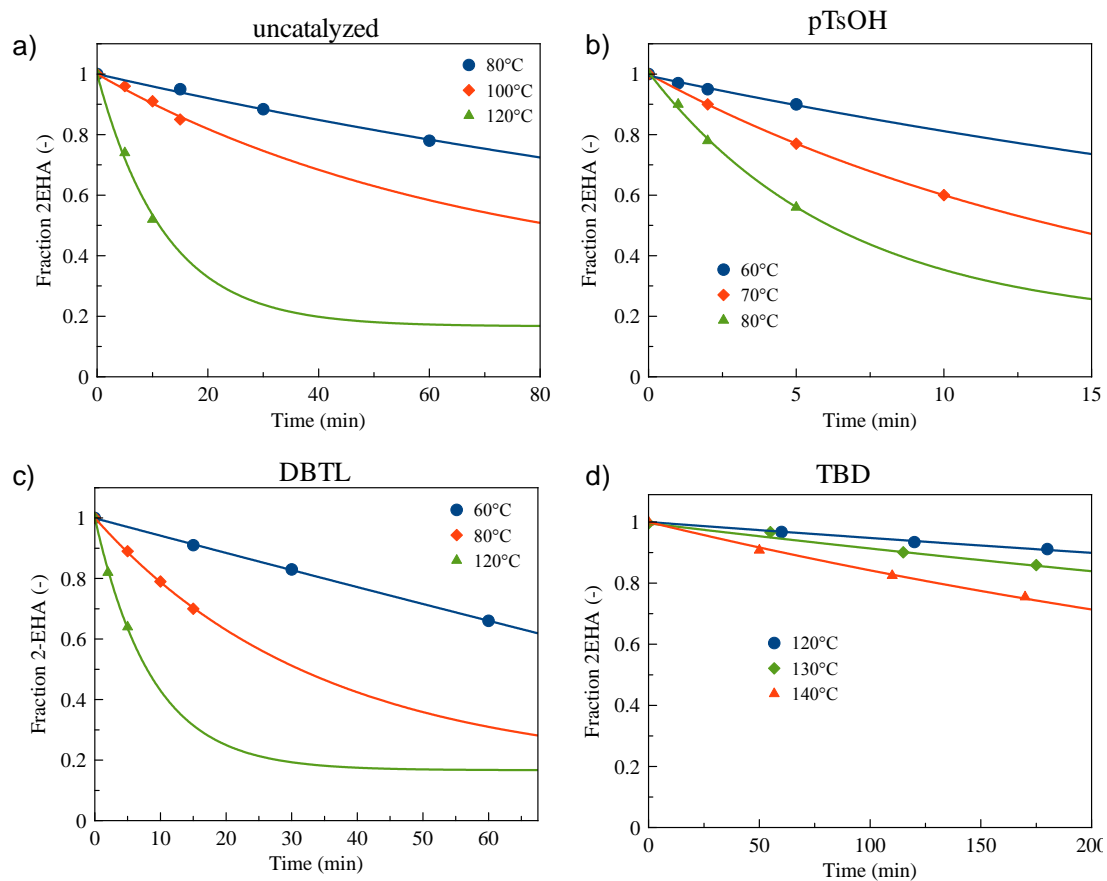

**Supplementary Figure 2:** Decrease of the fraction of 2-EHA as a function of the time at different temperatures a) without catalyst or in presence of b) *p*TsOH, c) DBTL or d) TBD.

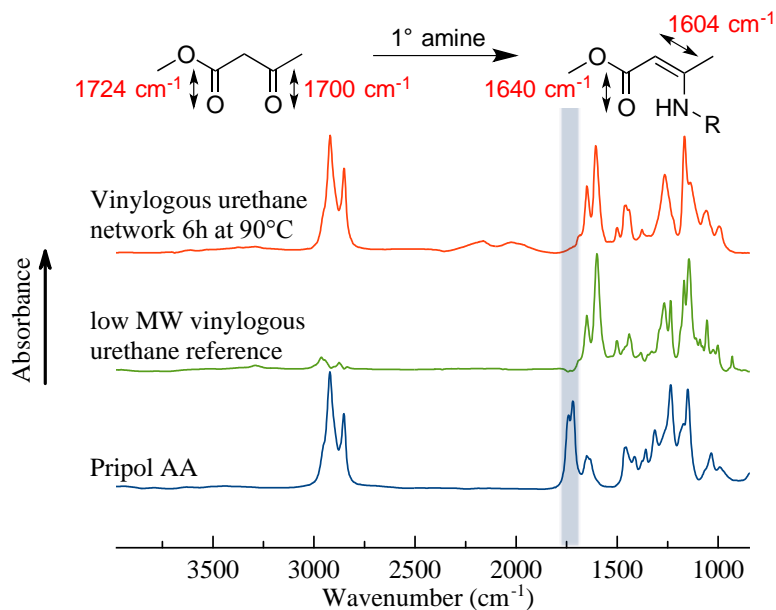

**Supplementary Figure 3:** FT-IR spectra showing the full conversion of the starting compound (acetoacetylated pripol 2044) to the corresponding vinyllogous urethane.

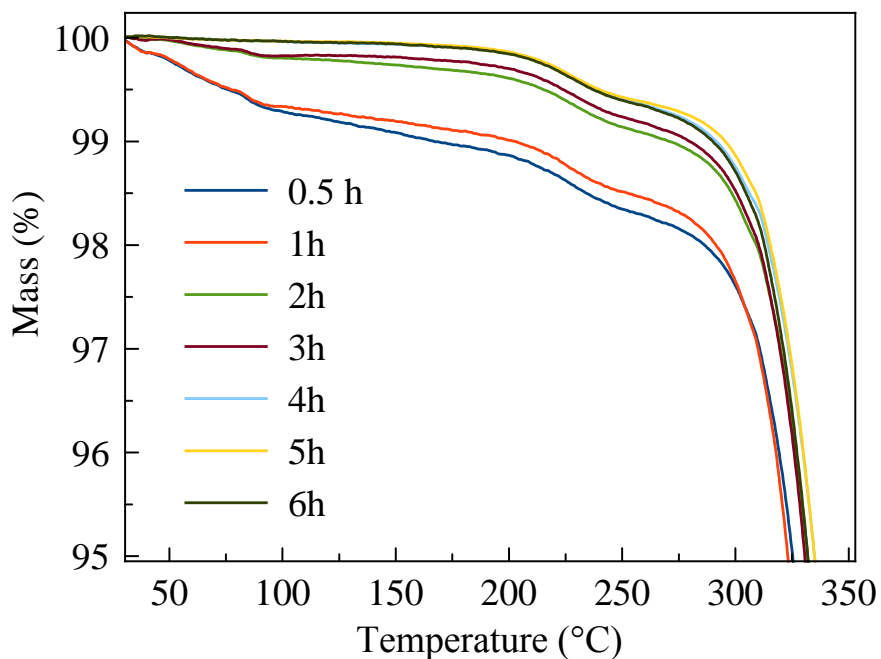

**Supplementary Figure 4:** TGA measurements of the vinyllogous urethane elastomers after different curing times at 90°C. After 4h, no more mass loss is observed before 200°C, indicating the complete evaporation of the water condensate.

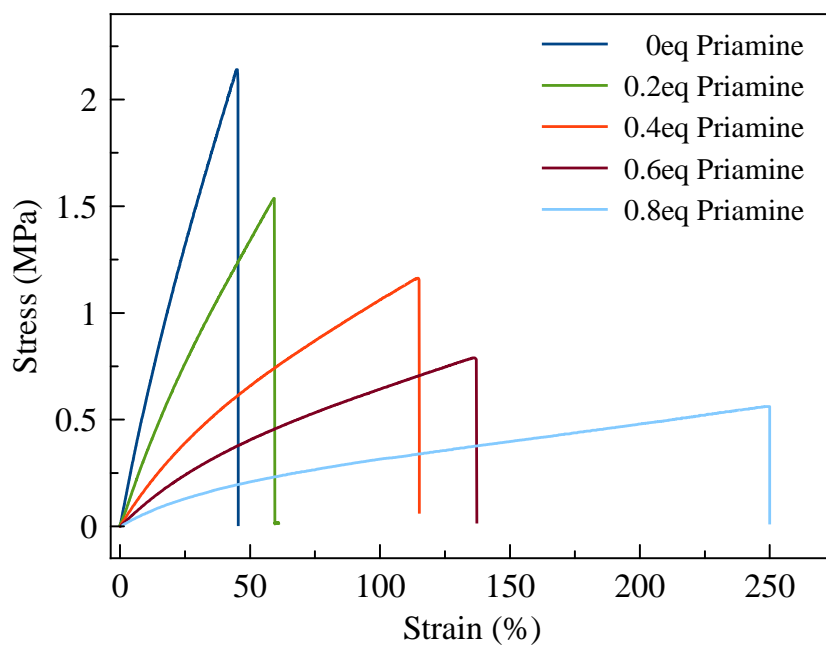

**Supplementary Figure 5:** Tensile tests of vinylgous urethane vitrimers with different compositions.

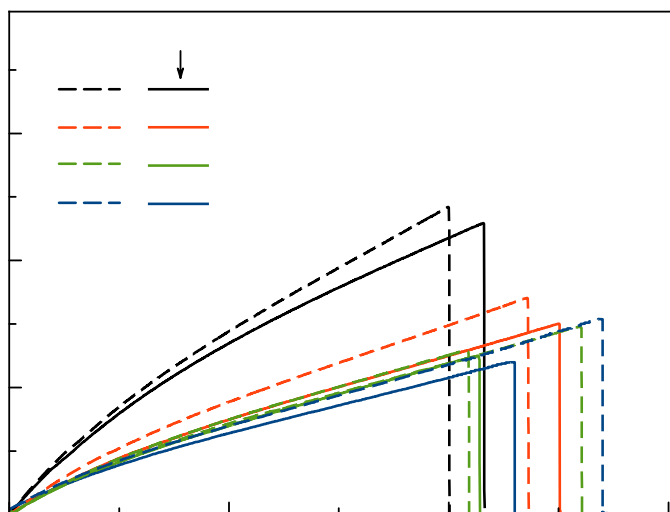

**Supplementary Figure 6:** Tensile test after recycling of the uncatalyzed (full line) and acid catalyzed (dotted line) samples with a stoichiometric ratio of 0.40 : 0.40 : 0.95. Recycling was performed by first grinding the material followed by compression moulding for 30 minutes at 150°C.

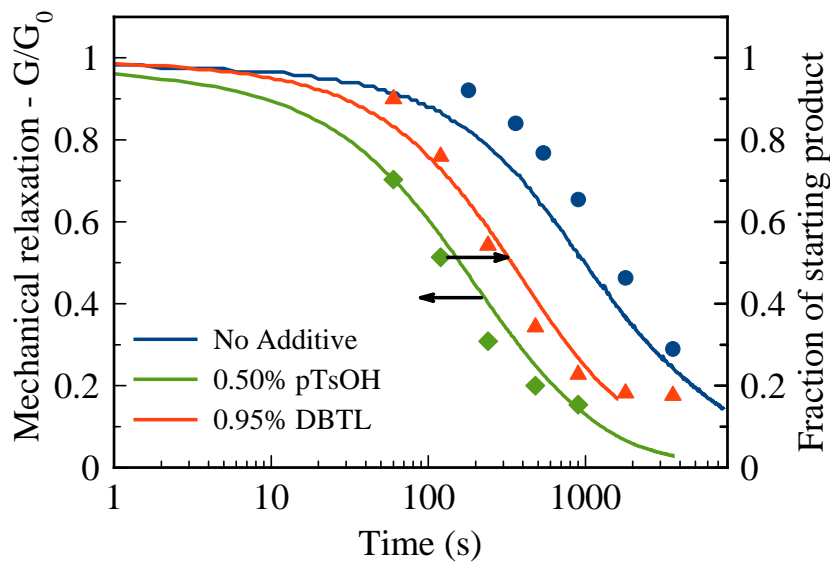

**Supplementary Figure 7:** Comparison of the conversion of the model compound (dots, right axis) with the mechanical stress-relaxation (full line, left axis) caused by the uncatalyzed, *p*TsOH and DBTL catalyzed exchange reactions, both in the case of model reactions and VU vitrimer samples.

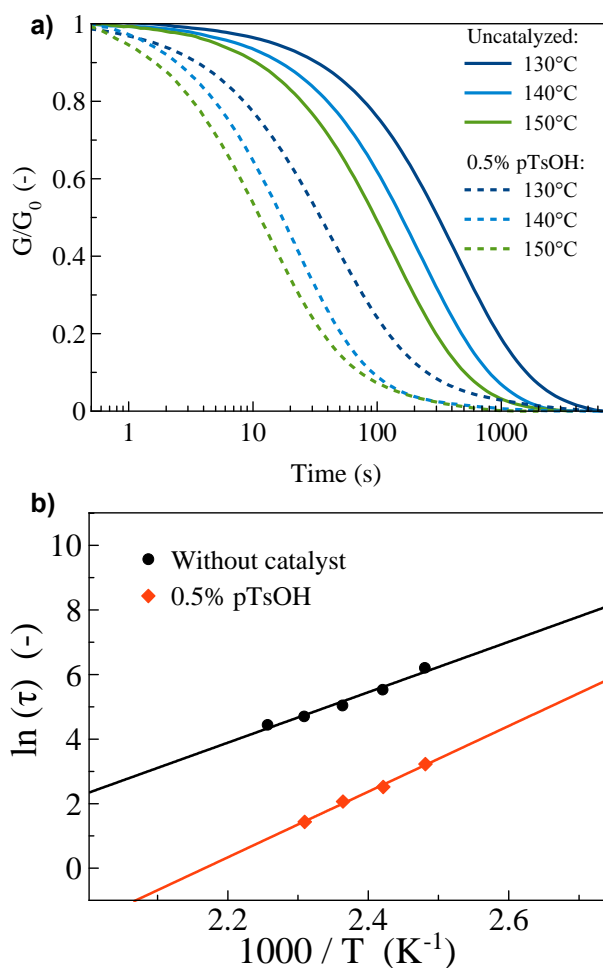

**Supplementary Figure 8:** Stress-relaxation experiments for rigid VU networks. b) Arrhenius plot of the relaxation times of rigid VU networks.

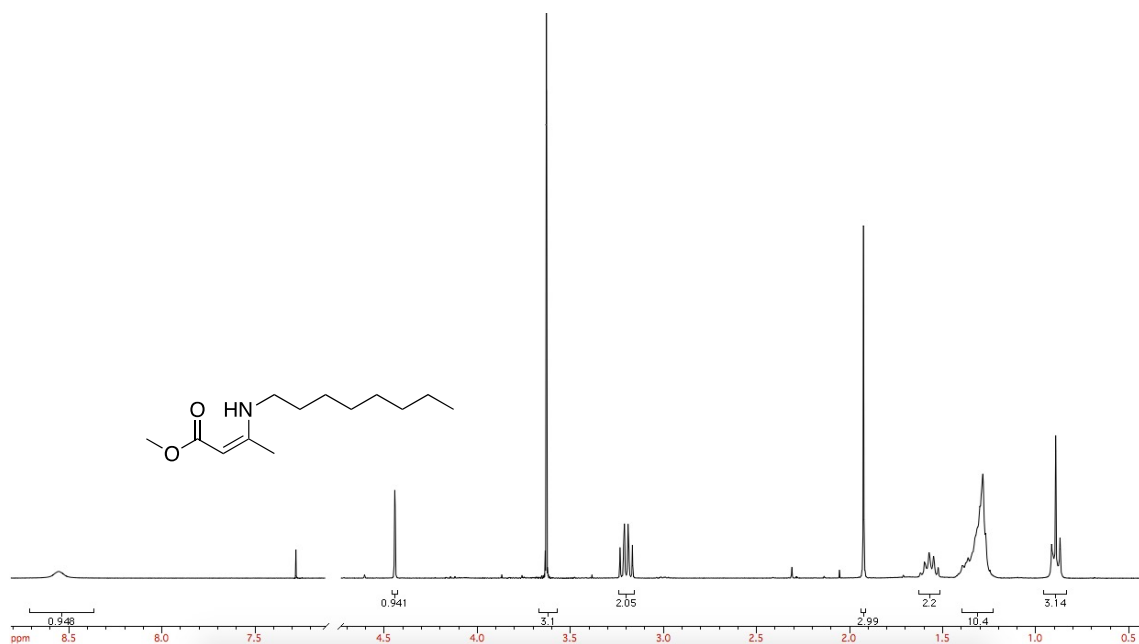

**Supplementary Figure 9:** <sup>1</sup>H-NMR of Methyl-3-(octylamino)but-2-enoate (*i.e.* *N*-octyl vinylogous urethane).

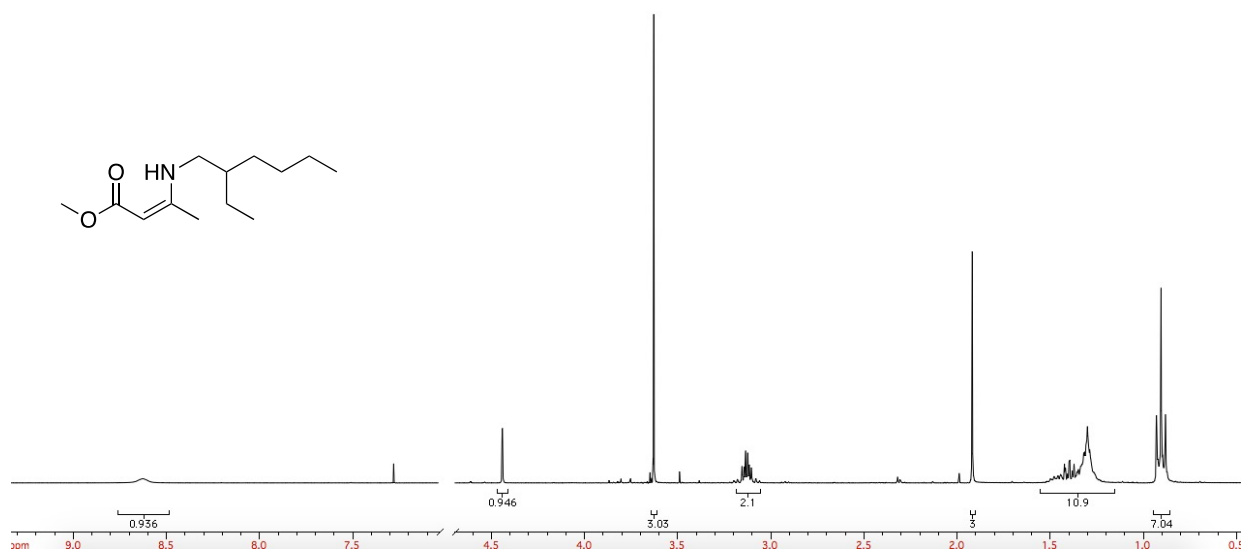

**Supplementary Figure 10:** <sup>1</sup>H-NMR of methyl-3-((2-ethylhexyl)amino)but-2-enoate (*N*-2EH vinylogous urethane).

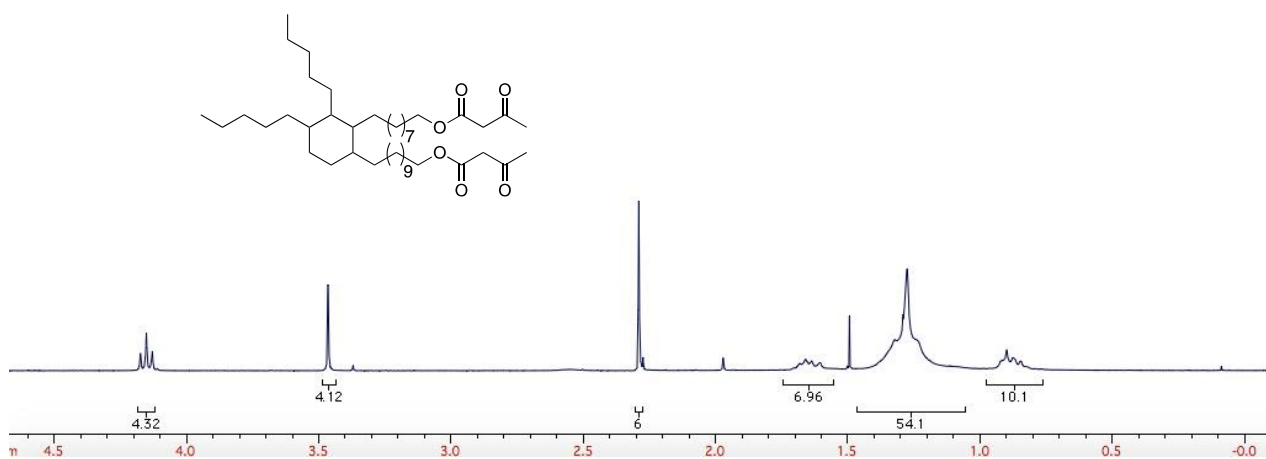

**Supplementary Figure 11:** <sup>1</sup>H-NMR of acetoacetylated pipol 2044.

**Supplementary Table 1:** k-values obtained from the fitting of the curves of Supplementary Figure 2 and used for the Arrhenius plots.

|             | Temperature<br>(°C) | k<br>(s <sup>-1</sup> ) |
|-------------|---------------------|-------------------------|
| Uncatalyzed | 80                  | 3,71E-03                |
|             | 100                 | 9,57E-03                |
|             | 120                 | 4,80E-02                |
| pTsOH       | 60                  | 1,93E-02                |
|             | 70                  | 3,96E-02                |
|             | 80                  | 8,71E-02                |
| DBTL        | 60                  | 5,60E-03                |
|             | 80                  | 2,45E-02                |
|             | 120                 | 7,11E-02                |
| TBD         | 120                 | 3,88E-04                |
|             | 130                 | 8,68E-04                |
|             | 140                 | 1,75E-03                |

**Supplementary Table 2:** Properties of soft VU networks with different compositions.

| Equivalents of<br>5 : 6 : 7 | $T_g$<br>(°C) | $E'$<br>(MPa) <sup>a</sup> | Young<br>modulus E<br>(MPa) <sup>b</sup> | Elongation<br>at failure<br>(%) <sup>b</sup> | Stress at<br>failure<br>(MPa) <sup>b</sup> |
|-----------------------------|---------------|----------------------------|------------------------------------------|----------------------------------------------|--------------------------------------------|
| 0.00 : 0.67 : 0.95          | - 9           | 3.9                        | 3.35 ± 0.01                              | 46 ± 5                                       | 2.22 ± 0.25                                |
| 0.20 : 0.53 : 0.95          | - 20          | 3.3                        | 2.34 ± 0.02                              | 65 ± 7                                       | 1.74 ± 0.27                                |
| 0.40 : 0.40 : 0.95          | - 25          | 2.2                        | 1.99 ± 0.05                              | 119 ± 9                                      | 1.20 ± 0.06                                |
| 0.60 : 0.27 : 0.95          | - 30          | 1.5                        | 1.13 ± 0.02                              | 140 ± 6                                      | 0.81 ± 0.05                                |
| 0.80 : 0.13 : 0.95          | - 33          | 1.1                        | 0.64 ± 0.05                              | 255 ± 35                                     | 0.55 ± 0.03                                |

a) Measured *via* DMTA at 50°C. b) Measured *via* tensile testing, average of 4 measurements.

**Supplementary Table 3:** Calculated activation energies from the stress-relaxation experiments and calculated freezing transition temperature.

| Catalyst                             | $E_a$<br>(KJ mol <sup>-1</sup> ) | $T_v$<br>(°C) |
|--------------------------------------|----------------------------------|---------------|
| Uncatalyzed                          | 81 ± 3                           | 27            |
| 0.50% pTsOH                          | 70 ± 4                           | -1            |
| 0.25% H <sub>2</sub> SO <sub>4</sub> | 70 ± 5                           | 10            |
| 0.95% DBTL                           | 30 ± 4                           | -63           |
| 1.90% DBTL                           | 31 ± 10                          | -70           |
| 0.50% TBD                            | 122 ± 19                         | 87            |

## Supplementary Note 1

k-values were obtained using<sup>1</sup>:

$$[Reactant] = 1 - (x_{\infty} - \exp\left(\frac{-kt}{x_{\infty}}\right)) \quad \text{Supplementary Equation 1}$$

With  $x_{\infty}$  = equilibrium concentration of the products =  $\frac{5}{6}$

*Fitted for k = initial rate*

The activation energy was calculated by plotting ln k versus 1000/T.

$$\ln k = -\frac{E_a}{RT} + cte \quad \text{Supplementary Equation 2}$$



# 1 Supplementary Reference

1) Logan, S. R. The kinetics of isotopic exchange reactions. *J. Chem. Educ.* **67**, 371 (1990).
